# Supplementary material
Source: MDPI journal article supplement (https://www.mdpi.com/2077-0472/13/5/1104)
Supplement: s1 [file s1 › agriculture-2361312-supplementary.pdf]

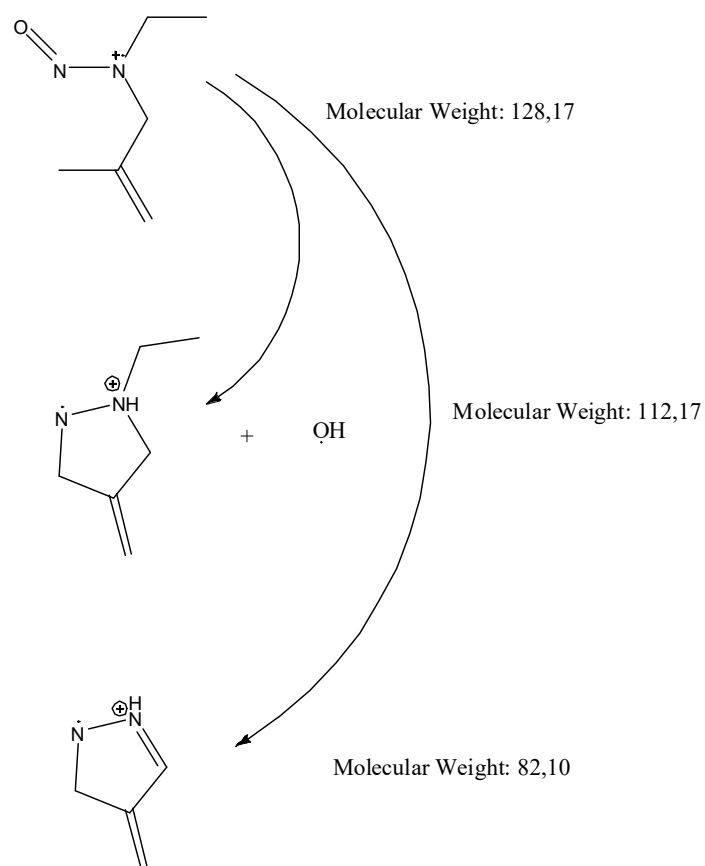

**Figure S1.** EMANA EI-MS (SIM) proposed fragmentation mechanism.

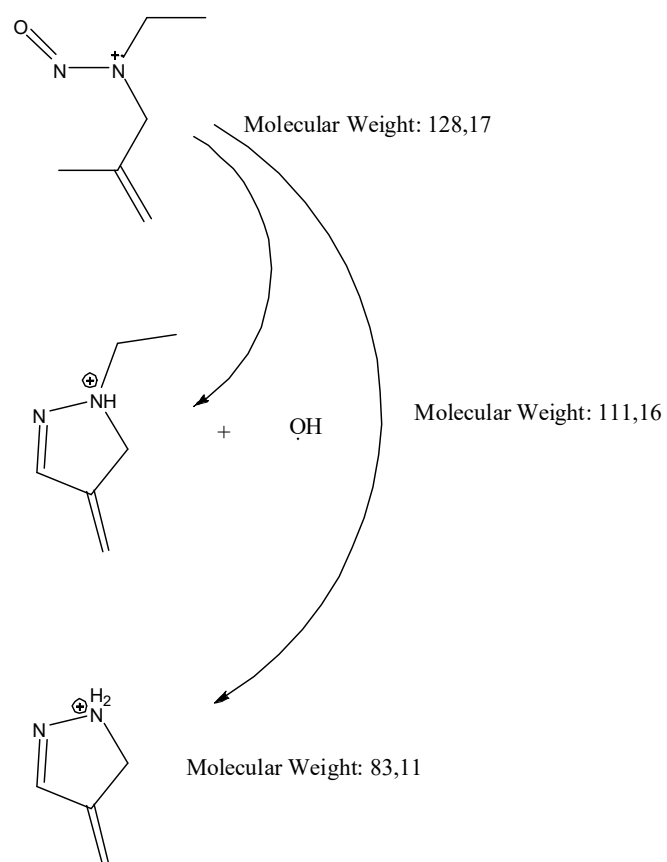

**Figure S2.** EMANA EI-MS/MS proposed fragmentation mechanism.

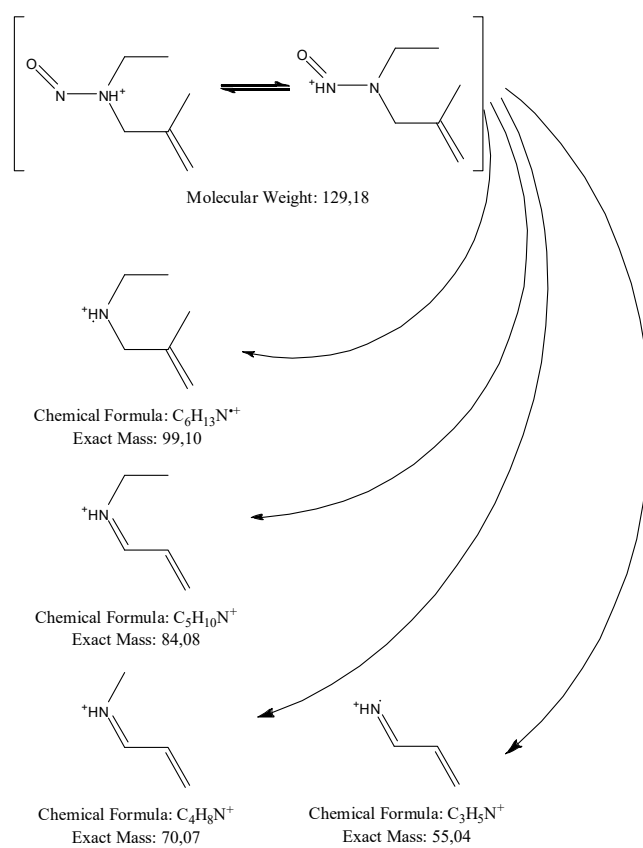

**Figure S3.** EMANA PCI-MS/MS proposed fragmentation mechanism.

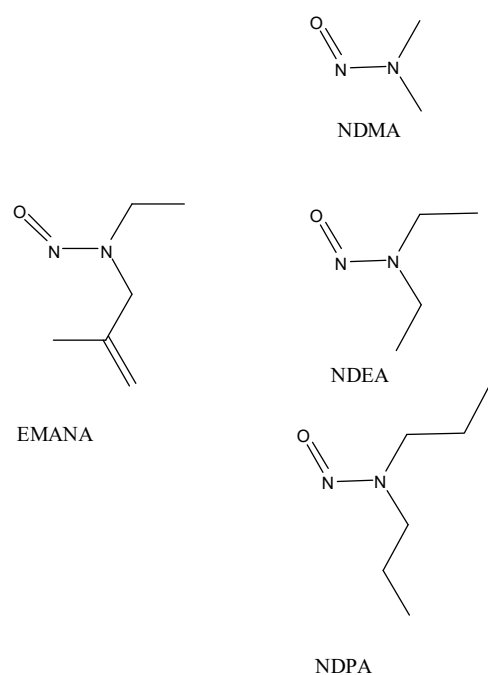

**Figure S4.** Structural resemblance of EMANA, NDMA and NDEA (IARC 2A classification-Probably carcinogenic to humans) and NDPA (IARC 2B classification-Possibly carcinogenic to humans).

Print Date: 23:45:31 Target Compound Report for #1 from 10-29-51 4387.xms

|                    |                 |                   |                         |
|--------------------|-----------------|-------------------|-------------------------|
| Sample ID:         |                 | Operator:         |                         |
| Instrument ID:     | Varian GC/MS #1 | Last Calibration: |                         |
| Measurement Type:  | Area            | Calibration Type: | External Standard       |
| Acquisition Date:  | 10:29           | Data File:        | ...23 10-29-51 4387.xms |
| Calculation Date:  | 12:17           | Method:           | ...ci ch4 v.0 final.mth |
| Sample Type:       | Analysis        |                   |                         |
| Inj. Sample Notes: | None            |                   |                         |

#### Compound Information

|               |       |                  |   |             |      |            |
|---------------|-------|------------------|---|-------------|------|------------|
| Peak Name:    | EMANA | Compound Number: | 1 | CAS Number: | None | Identified |
| Result Index: | 1     |                  |   |             |      |            |

#### Identification

| Parameter                 | Specification   | Actual              | Status |
|---------------------------|-----------------|---------------------|--------|
| Search Type               | Spectrum        |                     |        |
| Retention Time            | 5.996 +/- 0.200 | 5.978 min.          | Pass   |
| Match Result              | N-R >= 700      | 955                 | Pass   |
| Qual. Ion Ratio ( 1 ion ) | m/z 55:1:86.0%  | 68.8%- 103.2% 85.3% | Pass   |

#### Integration and Quantitation

| Parameter            | Specification        | Actual                     | Status |
|----------------------|----------------------|----------------------------|--------|
| Quan Ions            | 84.0                 |                            |        |
| Calibration Equation | Linear, Ignore, None | y = +2.0459e+5x -1.5919e+4 |        |
| Area                 | >=500                | 15999                      | Pass   |
| Height               |                      | 11869                      |        |
| Amount               | >= 0.000 PPM         | 0.156 PPM                  | Pass   |

Match Types: N-R : Normal-Reverse

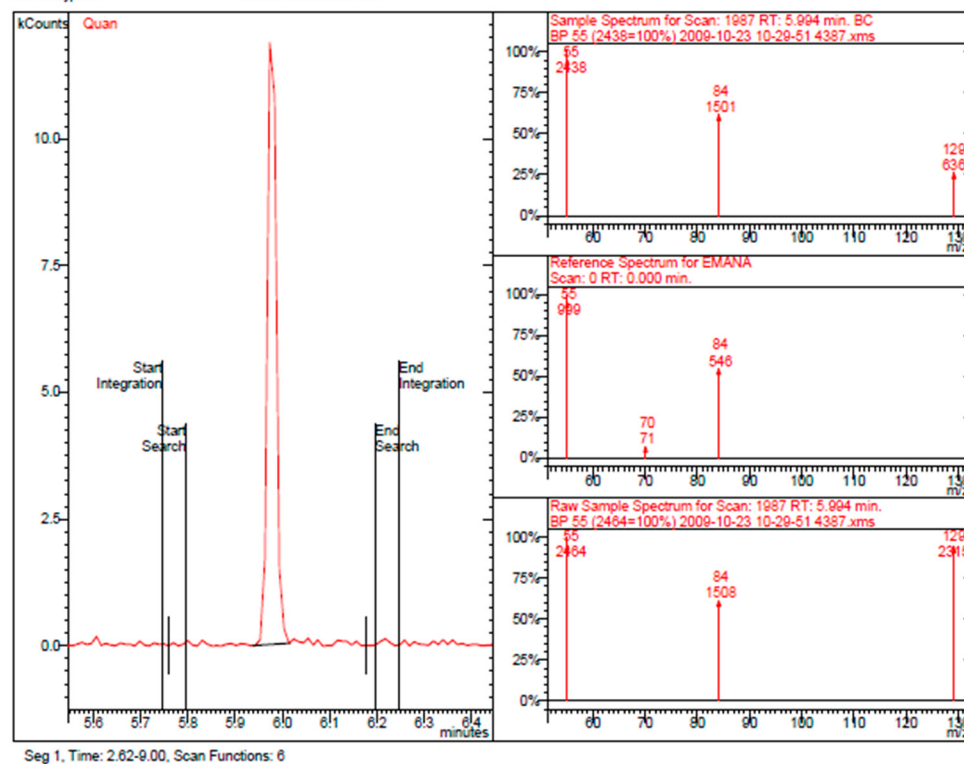

Figure S5. Target Compound Report from real sample with high interference.

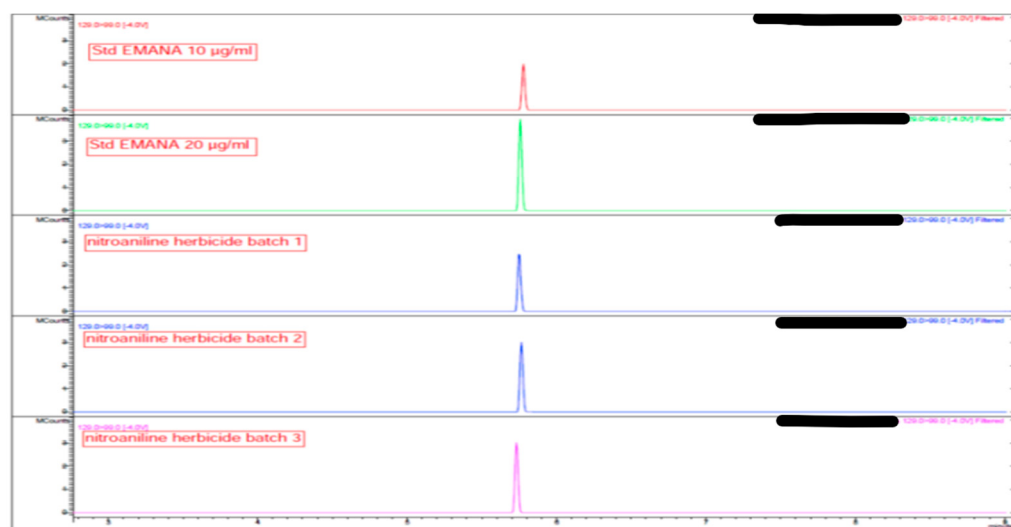

**Figure S6.** GC-PCI-MS/MS chromatograms of solutions of standard EMANA and non-compliant samples.
